# Supplementary material for: Genetic Continuity and Change Among the Indigenous Peoples of California
Source: PubMed Central journal article supplement (PMC10872549; doi:10.1038/s41586-023-06771-5), 2023-11-22
Supplement: NIHMS1941388-supplement-Supplementary_Information_Guide.pdf [file NIHMS1941388-supplement-Supplementary_Information_Guide.pdf]

## Supplementary Information Guide

# Genetic Continuity and Change Among the Indigenous Peoples of California

|                                                          |       |
|----------------------------------------------------------|-------|
| NOTE ON LOCAL GENETIC CONTINUITY IN MEXICO.....          | 2     |
| ARCHAEOLOGICAL SITE SUMMARIES.....                       | 3-13  |
| NUMBER OF INDIVIDUALS PER SITE.....                      | 3     |
| SAN CLEMENTE ISLAND (CALIFORNIA).....                    | 4     |
| SANTA ROSA ISLAND (CALIFORNIA).....                      | 4-5   |
| MALIBU (CALIFORNIA).....                                 | 5     |
| OJAI (CALIFORNIA).....                                   | 5     |
| CARPINTERIA (CALIFORNIA).....                            | 6     |
| SANTA BARBARA (CALIFORNIA).....                          | 7     |
| GOLETA (CALIFORNIA).....                                 | 6-7   |
| LAKE CACHUMA (CALIFORNIA).....                           | 7     |
| CARMEL (CALIFORNIA).....                                 | 8     |
| PEBBLE BEACH (CALIFORNIA).....                           | 8     |
| MONTEREY (CALIFORNIA).....                               | 8     |
| PACIFIC GROVE (CALIFORNIA).....                          | 8-9   |
| CASTROVILLE (CALIFORNIA).....                            | 9     |
| CALAVERAS COUNTY (CALIFORNIA).....                       | 9     |
| CERRO DE TRINCHERAS, SONORA (MEXICO).....                | 9-10  |
| TAYOPA, SAHUARIPA, SONORA (MEXICO).....                  | 10-11 |
| CUEVA DE LOS MUERTOS CHIQUITOS (MEXICO).....             | 11-12 |
| SAN LORENZO CAVE AND COYOTE CAVE, COAHUILA (MEXICO)..... | 12-13 |
| REFERENCES.....                                          | 14-15 |

# Supplementary Data Files

As separate Excel (.xlsx) files and 1 pdf file

## Supplementary Data File 1

(A) Meta-data about individuals newly sequenced or previously published from California or Northwest Mexico. (B) Technical information on each ancient DNA library built for all samples newly sequenced in this study as well as failed samples. (C) Meta-data of individuals previously published from other world regions that we co-analyzed with those from California and Northwest Mexico.

## Supplementary Data File 2

qpWave, showing genetic homogeneity within groups.

## Supplementary Data File 3

$F_{ST}$  between different groups.

## Supplementary Data File 4

$f_4$  results as tests of admixture and qpgraph worst fit Z-scores.

## Supplementary Data File 5

qpAdm estimates of ancestry.

## Supplementary Data File 6

qpWave analyses of migration into the Andes.

## Supplementary Data File 7

Inferred  $N_e$  from ROH.

## Supplementary Data File 8

Frequently Asked Questions (FAQ) document prepared for Indigenous community members and others about the paper.
